# Supplementary material for: TiO2 hollow spheres on reduced graphene oxide with high rate performance as anodes for lithium-ion batteries
Source: Royal Society of Chemistry journal article supplement (doi:10.1039/c7ra10681e), 2017-01-01
Supplement: c7ra10681e1.pdf [file c7ra10681e1.pdf]

## Supporting Information

### TiO<sub>2</sub> hollow spheres on reduced graphene oxide with high rate performance as anodes for lithium-ion batteries

Ji-Cai Liang,<sup>b</sup> Xun-Long Zhang,<sup>a</sup> Xiaojie Zhai<sup>a</sup>, Longjian Zhang<sup>c</sup>, Wenzheng Wu<sup>c\*</sup> and Kai-Feng Yu<sup>a\*</sup>

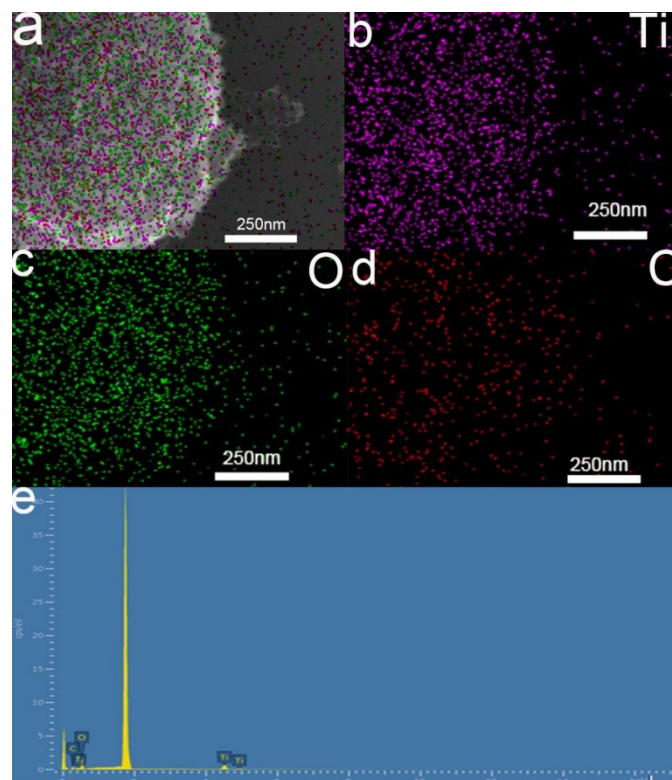

Figure S1. (a) Elemental mapping of TiO<sub>2</sub>@RGO nanocomposite (b-d) Ti (violet), O (green), and C (red) distribution in the selected area. (e) The bottom panel shows the EDX spectrum of the selected area.
